# Supplementary material for: Cu(ii)-assisted self-assembly of dicyandiamide-derived carbon dots: construction inspired from chemical evolution and its H2O2 sensing application
Source: Royal Society of Chemistry journal article supplement (doi:10.1039/d2an01232d), 2022-01-01

Supplemental Files

**Cu(II)-Assisted Self-Assembly of Dicyandiamide-Derived Carbon Dots: Construction Inspired from Chemical Evolution and Its H<sub>2</sub>O<sub>2</sub> Sensing Application**

**Jie Zhang,<sup>a</sup> Xue-Ji Zhang,<sup>ab</sup> Serge Cosnier<sup>c</sup> and Dan Shan<sup>\*a</sup>**

*<sup>a</sup> School of Environmental and Biological Engineering, Nanjing University of Science and Technology, Nanjing 210094, P R China*

*<sup>b</sup> School of Biomedical Engineering, Health Science Centre, Shenzhen University, Shenzhen 518060, P R China*

*<sup>c</sup> University of Grenoble Alpes-CNRS, DCM UMR 5250, F-38000 Grenoble, France*

**Table S1.** Summary of CVs analysis for the prepared-catalysts.

**Fig. S1 (A)** XPS survey peaks and **(B)** deconvoluted spectra of C 1s of DCD-CDs/Cu-200 and DCD-CDs/Cu-300.

**Fig. S2** Plots of peak current vs. scan rate.

**Fig. S3** Optimal mass loading of DCD-CDs/Cu-300 on surface of GCE.

**Fig. S4** Amperometric response of the DCD-CDs/Cu-300/GCE at different pH and temperatures.

**Table S1.** Summary of CVs analysis for the prepared-catalysts

| Electrode      | $E_{pa}$ (V) | $E_{pc}$ (V) | $E_{onset}$ (V) | $E_c$ (V) | $I_c$ (mA) |
|----------------|--------------|--------------|-----------------|-----------|------------|
| DCD-CDs/Cu-60  | -0.18        | -            | -0.27           | -0.71     | -0.084     |
|                | 0.096        |              |                 |           |            |
| DCD-CDs/Cu-100 | -0.20        | -            | 0.17            | -0.69     | -0.091     |
|                | 0.126        |              |                 |           |            |
| DCD-CDs/Cu-200 | -            | -            | -0.15           | -0.70     | -0.090     |
| DCD-CDs/Cu-300 | -0.124       | -0.34        | -0.02           | -0.50     | -0.11      |
|                | -0.03        |              |                 |           |            |
| DCD-CDs/Cu-400 | -0.09        | -0.174       | -0.32           | -0.80     | -0.085     |
|                |              | -0.38        |                 |           |            |
|                |              | -0.593       |                 |           |            |
| Pure CuO       | -0.09        | -0.129       | -0.47           | -0.80     | -0.088     |
|                |              | -0.402       |                 |           |            |
|                |              | -0.617       |                 |           |            |

Fig. S1

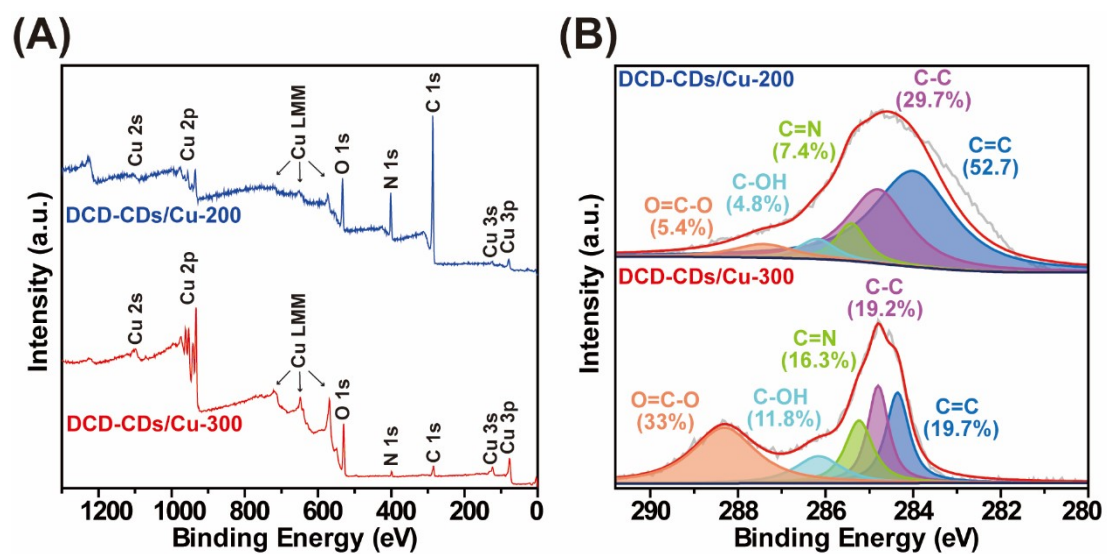

Fig. S2

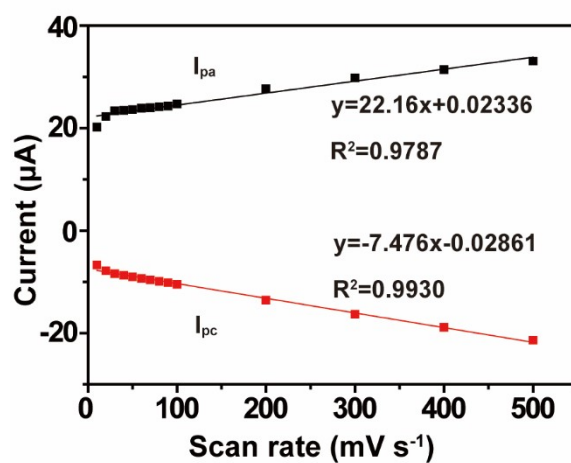

Fig. S3

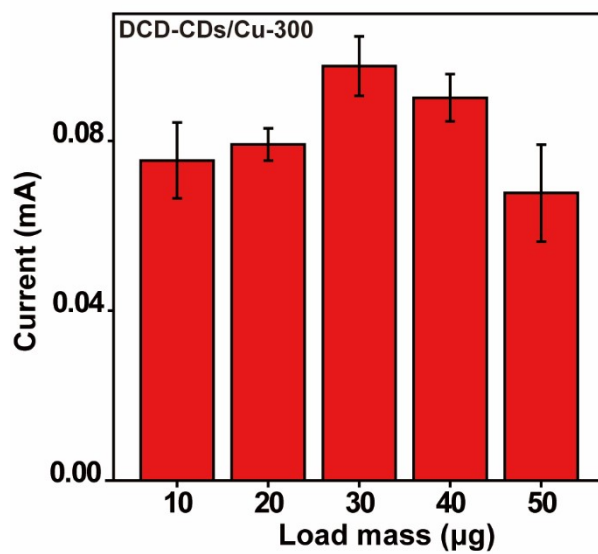

Fig. S4

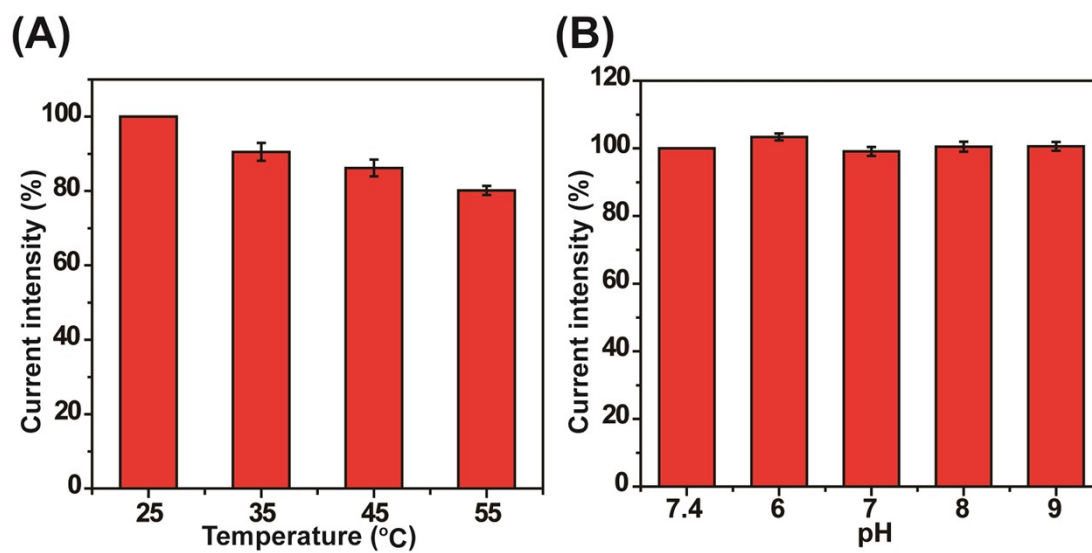

Supplement: d2an01232d1.pdf [file d2an01232d1.pdf]
